# Supplementary material
Source: MDPI journal article supplement (https://www.mdpi.com/2077-1312/5/1/4)
Supplement: s1 [file s1]

## Supplementary Materials: Evaluating the Reliability of Counting Bacteria Using Epifluorescence Microscopy

Thirumahal Muthukrishnan, Anesh Govender, Sergey Dobretsov and Raeid M.M. Abed

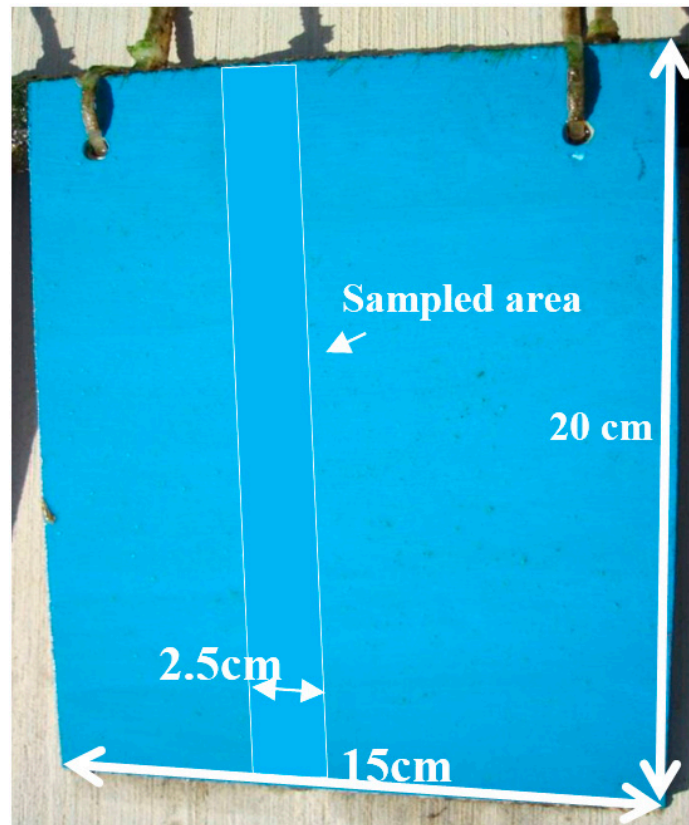

**Figure S1.** Area of biofilm collection (20 cm × 2.5 cm; outlined in white) from the surface of the panel (20 cm × 15 cm) coated with antifouling coating, IME.
